# Supplementary material
Source: PubMed Central journal article supplement (PMC9365357)

Figure S1

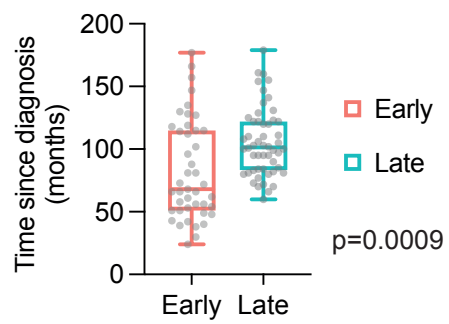

Supplement: ccr-21-1643_figure_s1_supps1.pdf [file ccr-21-1643_figure_s1_supps1.pdf]

Figure S4

early late

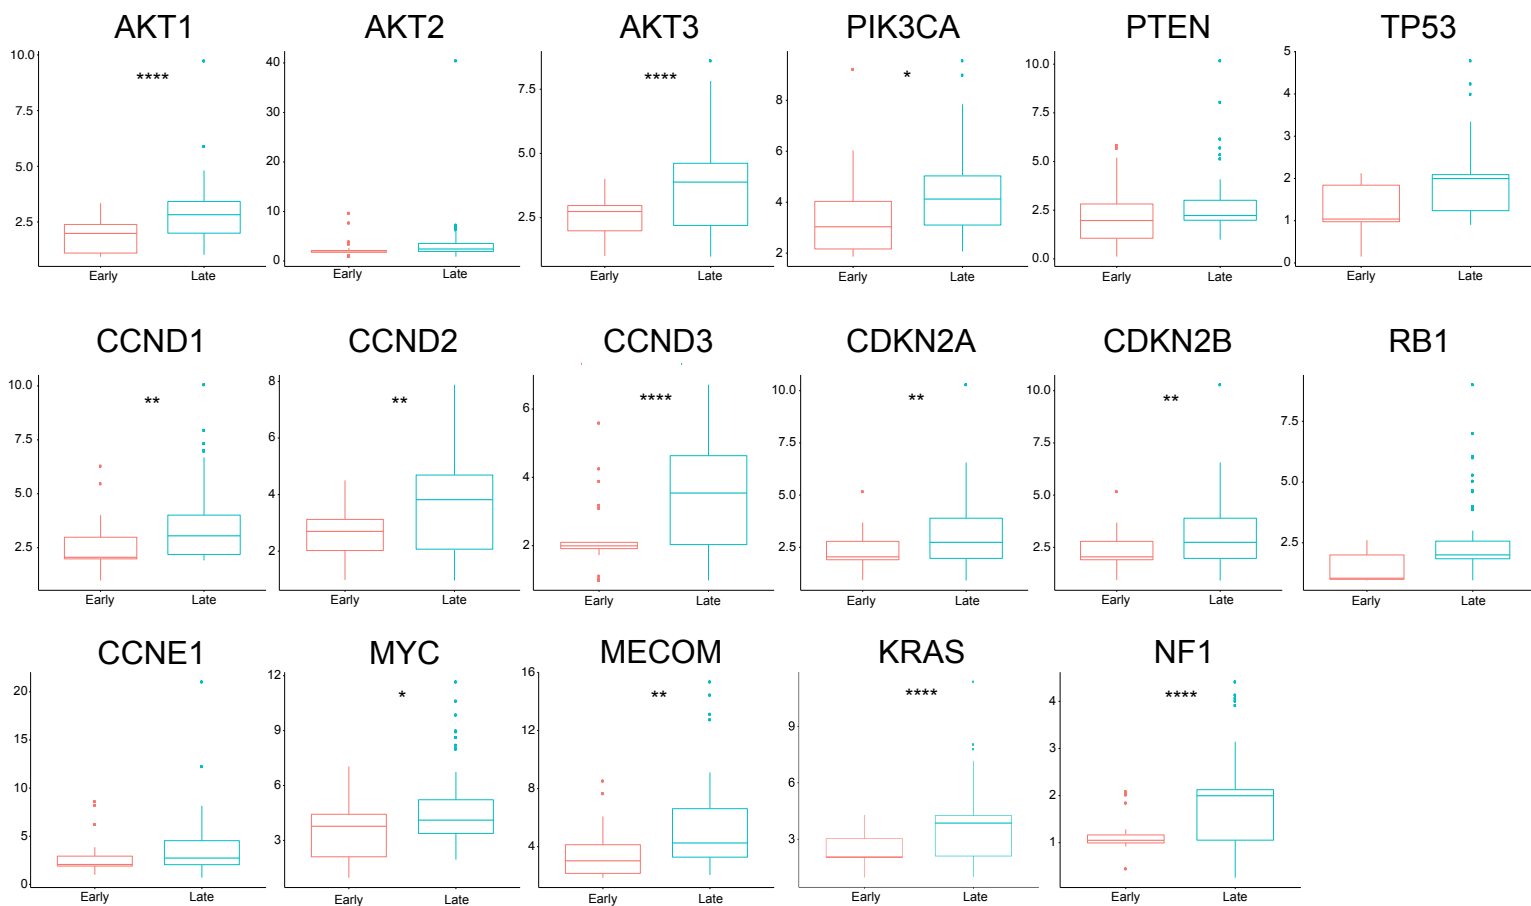

Supplement: ccr-21-1643_figure_s4_supps4.pdf [file ccr-21-1643_figure_s4_supps4.pdf]

Figure S5

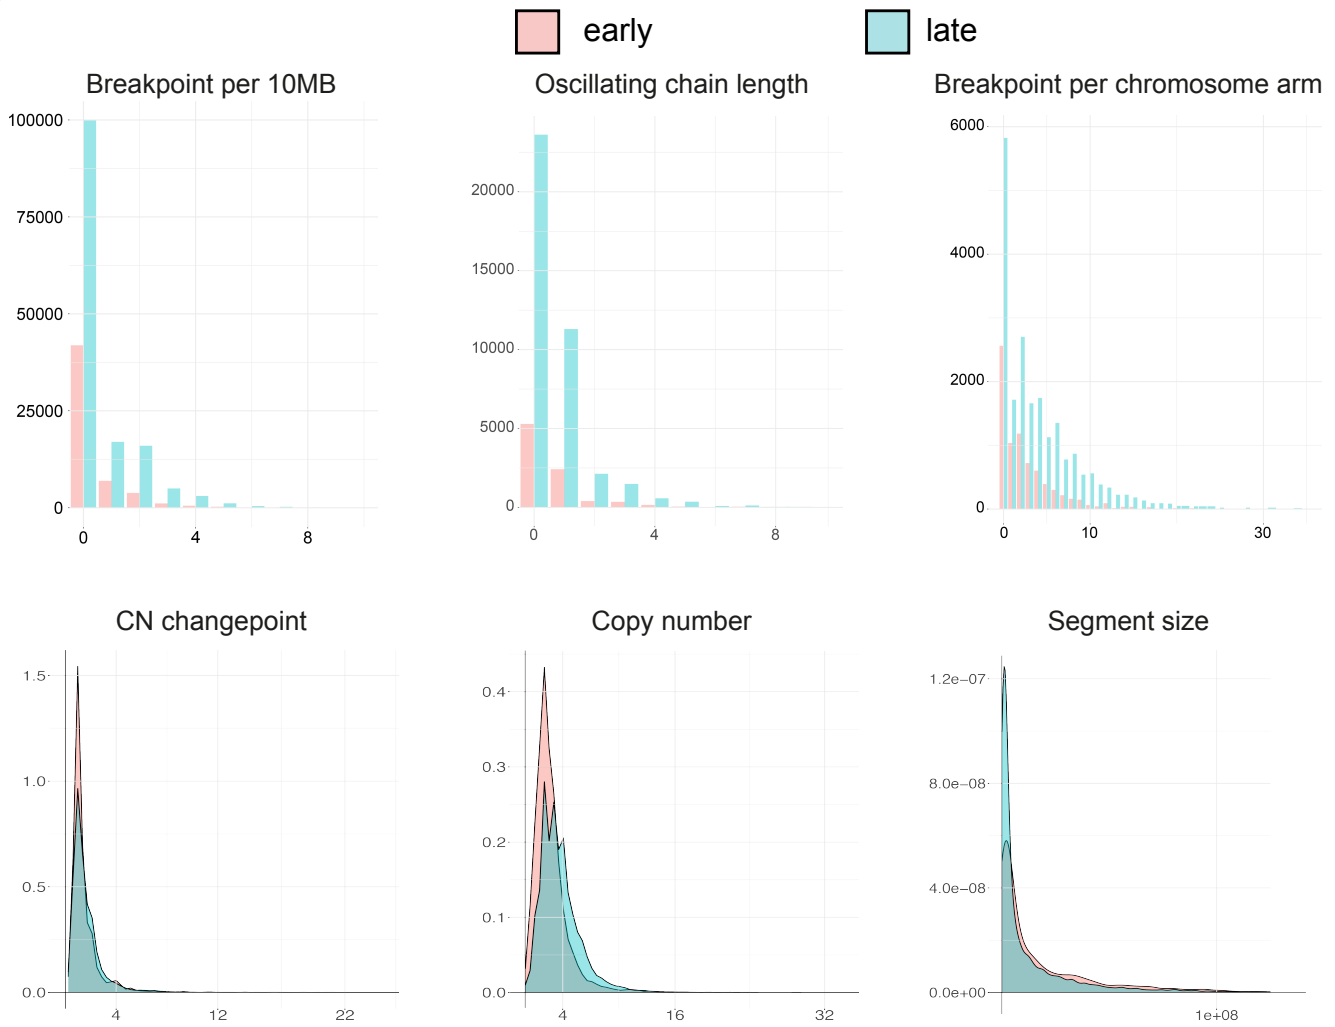

Supplement: ccr-21-1643_figure_s5_supps5.pdf [file ccr-21-1643_figure_s5_supps5.pdf]

Figure S7

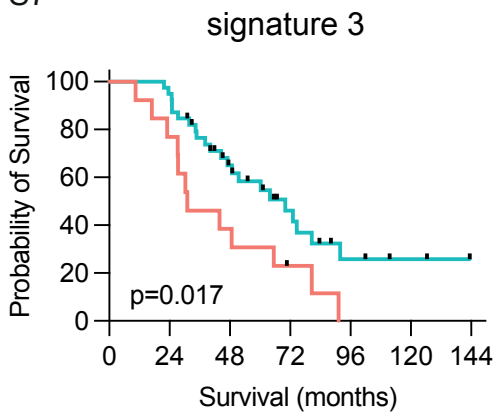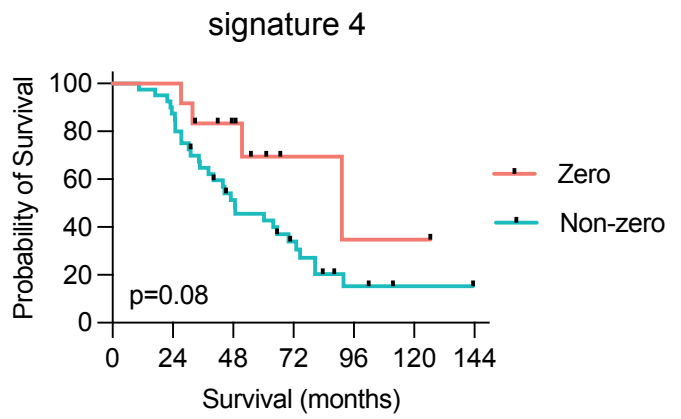

Supplement: ccr-21-1643_figure_s7_supps7.pdf [file ccr-21-1643_figure_s7_supps7.pdf]

Figure S8

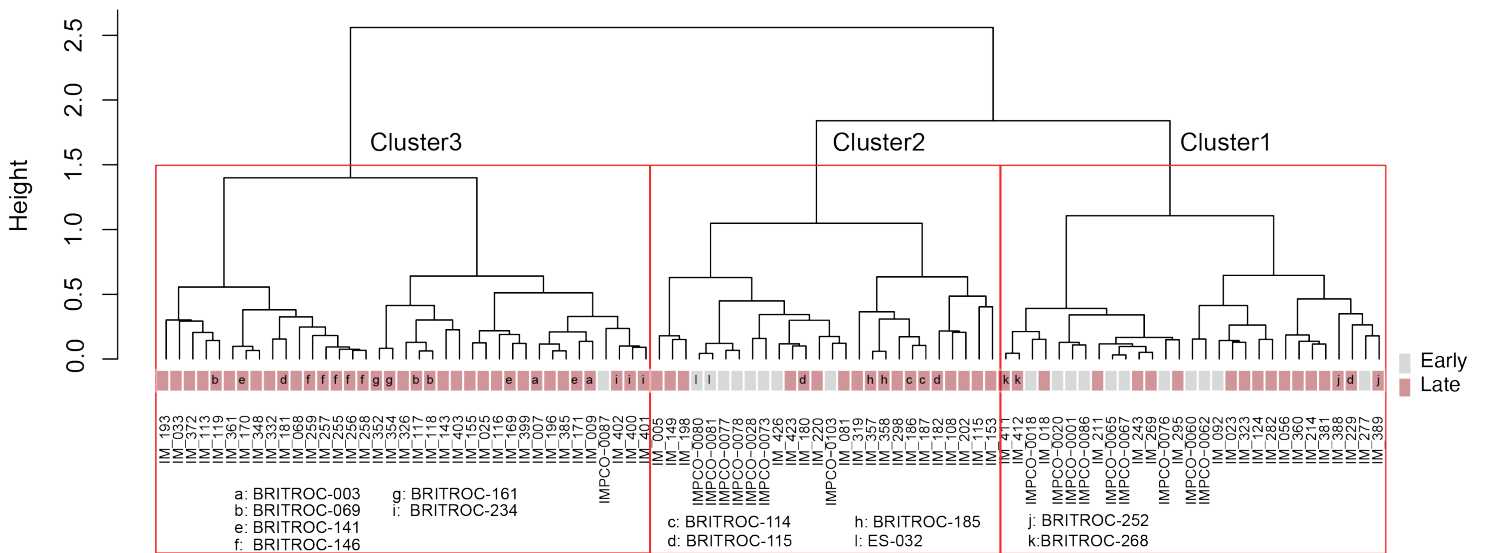

Supplement: ccr-21-1643_figure_s8_supps8.pdf [file ccr-21-1643_figure_s8_supps8.pdf]

Figure S10

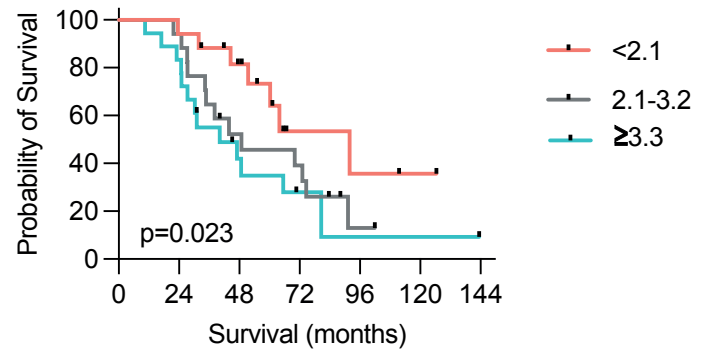

Supplement: ccr-21-1643_figures_s10_supps10.pdf [file ccr-21-1643_figures_s10_supps10.pdf]

Figure S2

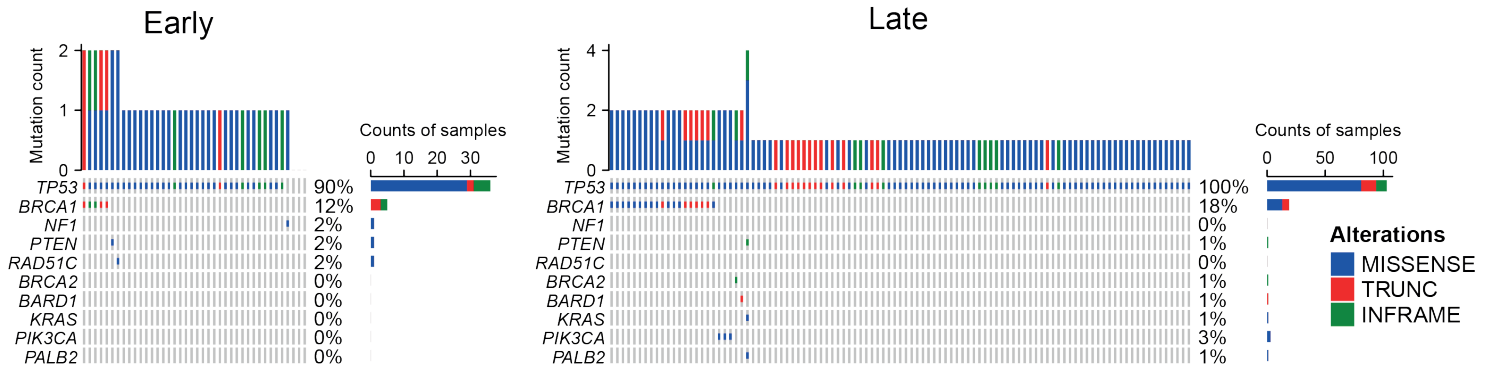

Supplement: ccr-21-1643_figures_s2_supps2.pdf [file ccr-21-1643_figures_s2_supps2.pdf]

Figure S3

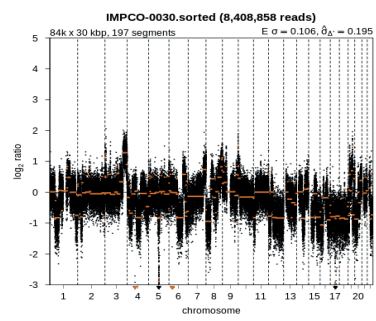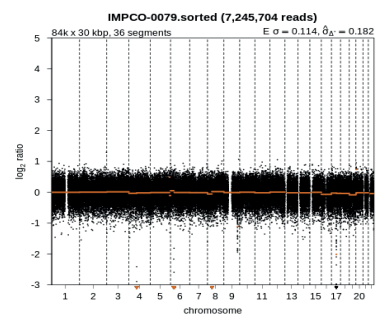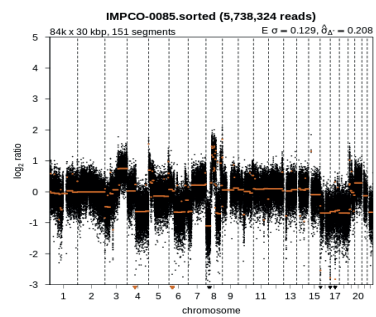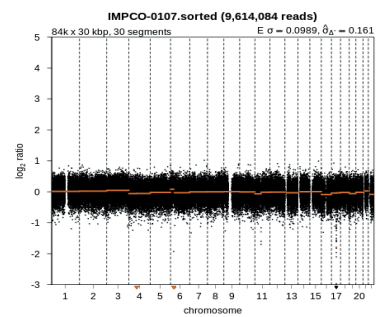

Supplement: ccr-21-1643_figures_s3_supps3.pdf [file ccr-21-1643_figures_s3_supps3.pdf]

Figure S9

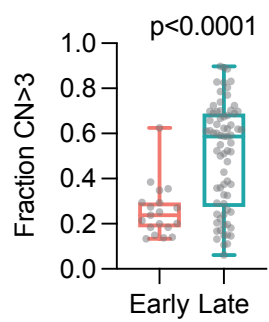

Supplement: ccr-21-1643_figures_s9_supps9.pdf [file ccr-21-1643_figures_s9_supps9.pdf]
